# Supplementary material for: Evaluation of EPISEQ SARS-CoV-2 and a Fully Integrated Application to Identify SARS-CoV-2 Variants from Several Next-Generation Sequencing Approaches
Source: MDPI journal article supplement (doi:10.3390/v14081674), 2022-07-29
Supplement: s1 [file s1]

**Table S1.** Description of the 12 (out of 1362) samples discordant in their Nextstrain clade or Pango lineage assignment between EPISEQ SARS-COV-2 and the reference pipeline.

| Dataset    | Clade<br>EPISEQ SARS-CoV-2 | Clade<br>Reference | Lineage<br>EPISEQ SARS-CoV-2    | Lineage<br>Reference            |
|------------|----------------------------|--------------------|---------------------------------|---------------------------------|
| ARTIC v3   | 20E (EU1)                  | 20E (EU1)          | B.1.177                         | B.1                             |
| ARTIC v4   | 20I (Alpha, V1)            | 20I (Alpha, V1)    | B.1.1.7                         | Q.6 (alias of B.1.1.7.6)        |
| ARTIC v4   | 21J (Delta)                | 21J (Delta)        | AY.127 (alias of B.1.617.2.127) | AY.33 (alias of B.1.617.2.33)   |
| ARTIC v4.1 | 21J (Delta)                | 21J (Delta)        | AY.39 (alias of B.1.617.2.39)   | AY.122 (alias of B.1.617.2.122) |
| ARTIC v4.1 | 21K (Omicron)              | 21K (Omicron)      | BA.1                            | BA.1.1                          |
| ARTIC v4.1 | 21K (Omicron)              | 21K (Omicron)      | BA.1                            | BA.1.1                          |
| ARTIC v4.1 | 21K (Omicron)              | 21K (Omicron)      | BA.1                            | BA.1.1                          |
| ARTIC v4.1 | 21K (Omicron)              | 21K (Omicron)      | BA.1                            | BA.1.1                          |
| ARTIC v4.1 | 21K (Omicron)              | 21K (Omicron)      | BA.1                            | BA.1.1                          |
| ARTIC v4.1 | 21K (Omicron)              | 21K (Omicron)      | BA.1                            | BA.1.1                          |
| ARTIC v4.1 | 21K (Omicron)              | None               | BA.1                            | BA.1                            |
| ARTIC v4.1 | 21K (Omicron)              | None               | BA.1.1                          | BA.1.1                          |

Legend: Concordant classifications are highlighted in green; discordant classifications are highlighted in red. Lineage aliases were identified using cov-lineages.org ([https://cov-lineages.org/lineage\\_list.html](https://cov-lineages.org/lineage_list.html))

**Table S2. Evaluation of SARS-CoV-2 sequencing results with the EPISEQ SARS-COV-2 pipeline (pre-omicron variants; n=21 samples)**

[illegible]

Amino acid mutations in spike and other encoded genes are shown relative to the data generated using the Illumina platform with the ARTIC v4.1 kit (empty field: same mutations as in the Illumina/ARTIC v4.1 sequence; fields with "+" or "-" signify the presence or absence of the indicated mutations, respectively. NGS results with genome coverage < 95% are highlighted in grey.

Table S3. Evaluation of SARS-CoV-2 sequencing results with the EPISEQ SARS-COV-2 pipeline (omicron variants; n=19 samples)

| sample   | Ct    | Coverage  |      |           |      | Nextclade |     |           |     | Pango     |      |           |      | Spike mutation                                                                                                                                                                                                                                       |                                                                                                                                                                                                                                                      |                         |                                               | ONT                                                                                                                                                                                                                                                                                                                                                                                                                                                                                                                                                                                                                                                                                                                                                                                                                                                                                                                                                                                                                                                                                                                                                                                                                                                                                                                                                                                                                                                                                                                                                                                                                                                                                                                                                                                                                                                                                                                                                                                                                                                                                                                                                                                                                                                                                                                                                                                                                                                                                                                                                                                                                                                                                                                                                                                                                                                                                                                                                                                                                                                                                                                                                                                                                                                                                                                                                                                                                                                                                                                                                                                                                                                                                                                                                                                                                                                                                                                                                                                                                                                                                                                                                                                                                                                                                                                                                                                                                                                                                                                                                                                                                                                                                                                                                                                                                                                                                                                                                                                                                                                                                                                                                                                                                                                                                                                                                                                                                                                                                                                                                                                                                                                                                                                                                                                                                                                                                                                                                                                                                                                                                                                                                                                                                                                                                                                                                                                                                                                                                                                                                                                                                                                                                                                                                                                                                                                                                                                                                                                                                                                                                                                                                                                                                                                                                                                                                                                                                                                                                                                                                                                                                                                                                                                                                                                                                                                                                                                                                                                                                                                                                                                                                                                                                                                                                                                                                                                                                                                                                                                                                                                                                                                                                                                                                                                                                                                                                                                                                                                                                                                                                                                                                                                                                                                                                                                                                                                                                                                                                                                                                                                                                                                                                                                                                                                                                                                                                                                                                                                                                                                                                                                                                                                       |                                                                                                                                                                                                                                                                                          |                                                            |                                                                                                | Other mutations |     |           |     |  |  | ONT       |     |           |     |
|----------|-------|-----------|------|-----------|------|-----------|-----|-----------|-----|-----------|------|-----------|------|------------------------------------------------------------------------------------------------------------------------------------------------------------------------------------------------------------------------------------------------------|------------------------------------------------------------------------------------------------------------------------------------------------------------------------------------------------------------------------------------------------------|-------------------------|-----------------------------------------------|-------------------------------------------------------------------------------------------------------------------------------------------------------------------------------------------------------------------------------------------------------------------------------------------------------------------------------------------------------------------------------------------------------------------------------------------------------------------------------------------------------------------------------------------------------------------------------------------------------------------------------------------------------------------------------------------------------------------------------------------------------------------------------------------------------------------------------------------------------------------------------------------------------------------------------------------------------------------------------------------------------------------------------------------------------------------------------------------------------------------------------------------------------------------------------------------------------------------------------------------------------------------------------------------------------------------------------------------------------------------------------------------------------------------------------------------------------------------------------------------------------------------------------------------------------------------------------------------------------------------------------------------------------------------------------------------------------------------------------------------------------------------------------------------------------------------------------------------------------------------------------------------------------------------------------------------------------------------------------------------------------------------------------------------------------------------------------------------------------------------------------------------------------------------------------------------------------------------------------------------------------------------------------------------------------------------------------------------------------------------------------------------------------------------------------------------------------------------------------------------------------------------------------------------------------------------------------------------------------------------------------------------------------------------------------------------------------------------------------------------------------------------------------------------------------------------------------------------------------------------------------------------------------------------------------------------------------------------------------------------------------------------------------------------------------------------------------------------------------------------------------------------------------------------------------------------------------------------------------------------------------------------------------------------------------------------------------------------------------------------------------------------------------------------------------------------------------------------------------------------------------------------------------------------------------------------------------------------------------------------------------------------------------------------------------------------------------------------------------------------------------------------------------------------------------------------------------------------------------------------------------------------------------------------------------------------------------------------------------------------------------------------------------------------------------------------------------------------------------------------------------------------------------------------------------------------------------------------------------------------------------------------------------------------------------------------------------------------------------------------------------------------------------------------------------------------------------------------------------------------------------------------------------------------------------------------------------------------------------------------------------------------------------------------------------------------------------------------------------------------------------------------------------------------------------------------------------------------------------------------------------------------------------------------------------------------------------------------------------------------------------------------------------------------------------------------------------------------------------------------------------------------------------------------------------------------------------------------------------------------------------------------------------------------------------------------------------------------------------------------------------------------------------------------------------------------------------------------------------------------------------------------------------------------------------------------------------------------------------------------------------------------------------------------------------------------------------------------------------------------------------------------------------------------------------------------------------------------------------------------------------------------------------------------------------------------------------------------------------------------------------------------------------------------------------------------------------------------------------------------------------------------------------------------------------------------------------------------------------------------------------------------------------------------------------------------------------------------------------------------------------------------------------------------------------------------------------------------------------------------------------------------------------------------------------------------------------------------------------------------------------------------------------------------------------------------------------------------------------------------------------------------------------------------------------------------------------------------------------------------------------------------------------------------------------------------------------------------------------------------------------------------------------------------------------------------------------------------------------------------------------------------------------------------------------------------------------------------------------------------------------------------------------------------------------------------------------------------------------------------------------------------------------------------------------------------------------------------------------------------------------------------------------------------------------------------------------------------------------------------------------------------------------------------------------------------------------------------------------------------------------------------------------------------------------------------------------------------------------------------------------------------------------------------------------------------------------------------------------------------------------------------------------------------------------------------------------------------------------------------------------------------------------------------------------------------------------------------------------------------------------------------------------------------------------------------------------------------------------------------------------------------------------------------------------------------------------------------------------------------------------------------------------------------------------------------------------------------------------------------------------------------------------------------------------------------------------------------------------------------------------------------------------------------------------------------------------------------------------------------------------------------------------------------------------------------------------------------------------------------------------------------------------------------------------------------------------------------------------------------------------------------------------------------------------------------------------------------------------------------------------------------------------------------------------------------------------------------------------------------------------------------------------------------------------------------------------------------------------------------------------------------------------------------------------------------------------------------------------------------------------------------------------------------------------------------------------------------------------------------------------------------------------------------------------------------------------------------------------------------------------------------------------------------------------------------------------------------------------------------------------------------------------------------------------------------------------------------------------------------------------------------------------------------------------------------|------------------------------------------------------------------------------------------------------------------------------------------------------------------------------------------------------------------------------------------------------------------------------------------|------------------------------------------------------------|------------------------------------------------------------------------------------------------|-----------------|-----|-----------|-----|--|--|-----------|-----|-----------|-----|
|          |       | Illumina  |      | ONT       |      | Illumina  |     | ONT       |     | Illumina  |      | ONT       |      |                                                                                                                                                                                                                                                      |                                                                                                                                                                                                                                                      |                         |                                               |                                                                                                                                                                                                                                                                                                                                                                                                                                                                                                                                                                                                                                                                                                                                                                                                                                                                                                                                                                                                                                                                                                                                                                                                                                                                                                                                                                                                                                                                                                                                                                                                                                                                                                                                                                                                                                                                                                                                                                                                                                                                                                                                                                                                                                                                                                                                                                                                                                                                                                                                                                                                                                                                                                                                                                                                                                                                                                                                                                                                                                                                                                                                                                                                                                                                                                                                                                                                                                                                                                                                                                                                                                                                                                                                                                                                                                                                                                                                                                                                                                                                                                                                                                                                                                                                                                                                                                                                                                                                                                                                                                                                                                                                                                                                                                                                                                                                                                                                                                                                                                                                                                                                                                                                                                                                                                                                                                                                                                                                                                                                                                                                                                                                                                                                                                                                                                                                                                                                                                                                                                                                                                                                                                                                                                                                                                                                                                                                                                                                                                                                                                                                                                                                                                                                                                                                                                                                                                                                                                                                                                                                                                                                                                                                                                                                                                                                                                                                                                                                                                                                                                                                                                                                                                                                                                                                                                                                                                                                                                                                                                                                                                                                                                                                                                                                                                                                                                                                                                                                                                                                                                                                                                                                                                                                                                                                                                                                                                                                                                                                                                                                                                                                                                                                                                                                                                                                                                                                                                                                                                                                                                                                                                                                                                                                                                                                                                                                                                                                                                                                                                                                                                                                                                                           |                                                                                                                                                                                                                                                                                          |                                                            |                                                                                                | Illumina        |     | ONT       |     |  |  | Illumina  |     | ONT       |     |
|          |       | artC_v4.1 | vs2  | artC_v4.1 | vs2  | artC_v4.1 | vs2 | artC_v4.1 | vs2 | artC_v4.1 | vs2  | artC_v4.1 | vs2  |                                                                                                                                                                                                                                                      |                                                                                                                                                                                                                                                      |                         |                                               |                                                                                                                                                                                                                                                                                                                                                                                                                                                                                                                                                                                                                                                                                                                                                                                                                                                                                                                                                                                                                                                                                                                                                                                                                                                                                                                                                                                                                                                                                                                                                                                                                                                                                                                                                                                                                                                                                                                                                                                                                                                                                                                                                                                                                                                                                                                                                                                                                                                                                                                                                                                                                                                                                                                                                                                                                                                                                                                                                                                                                                                                                                                                                                                                                                                                                                                                                                                                                                                                                                                                                                                                                                                                                                                                                                                                                                                                                                                                                                                                                                                                                                                                                                                                                                                                                                                                                                                                                                                                                                                                                                                                                                                                                                                                                                                                                                                                                                                                                                                                                                                                                                                                                                                                                                                                                                                                                                                                                                                                                                                                                                                                                                                                                                                                                                                                                                                                                                                                                                                                                                                                                                                                                                                                                                                                                                                                                                                                                                                                                                                                                                                                                                                                                                                                                                                                                                                                                                                                                                                                                                                                                                                                                                                                                                                                                                                                                                                                                                                                                                                                                                                                                                                                                                                                                                                                                                                                                                                                                                                                                                                                                                                                                                                                                                                                                                                                                                                                                                                                                                                                                                                                                                                                                                                                                                                                                                                                                                                                                                                                                                                                                                                                                                                                                                                                                                                                                                                                                                                                                                                                                                                                                                                                                                                                                                                                                                                                                                                                                                                                                                                                                                                                                                                           |                                                                                                                                                                                                                                                                                          |                                                            |                                                                                                | artC_v4.1       | vs2 | artC_v4.1 | vs2 |  |  | artC_v4.1 | vs2 | artC_v4.1 | vs2 |
| sample22 | 16.86 | 99.8      | 92.1 | 99.5      | 69.1 | 21K       | 21K | 21K       | 21K | BA.1      | BA.1 | BA.1      | BA.1 | no data                                                                                                                                                                                                                                              | A67V, H69, V70, T9S1, G142-, V143-, Y144-, Y145D, N211-, L2121, G339D, S371L, S373P, S375F, K417N, N440K, G446S, S477N, T478K, E484A, Q493R, G496S, Q498R, N501Y, Y505H, T547K, D614G, H655Y, N679K, P681H, N764K, D796Y, N856K, Q954H, N969K, 981F] | -N211-, -L2121-, -N440K | N211-, -L2121-, -N440K, -G446S, N764K, -D796Y |                                                                                                                                                                                                                                                                                                                                                                                                                                                                                                                                                                                                                                                                                                                                                                                                                                                                                                                                                                                                                                                                                                                                                                                                                                                                                                                                                                                                                                                                                                                                                                                                                                                                                                                                                                                                                                                                                                                                                                                                                                                                                                                                                                                                                                                                                                                                                                                                                                                                                                                                                                                                                                                                                                                                                                                                                                                                                                                                                                                                                                                                                                                                                                                                                                                                                                                                                                                                                                                                                                                                                                                                                                                                                                                                                                                                                                                                                                                                                                                                                                                                                                                                                                                                                                                                                                                                                                                                                                                                                                                                                                                                                                                                                                                                                                                                                                                                                                                                                                                                                                                                                                                                                                                                                                                                                                                                                                                                                                                                                                                                                                                                                                                                                                                                                                                                                                                                                                                                                                                                                                                                                                                                                                                                                                                                                                                                                                                                                                                                                                                                                                                                                                                                                                                                                                                                                                                                                                                                                                                                                                                                                                                                                                                                                                                                                                                                                                                                                                                                                                                                                                                                                                                                                                                                                                                                                                                                                                                                                                                                                                                                                                                                                                                                                                                                                                                                                                                                                                                                                                                                                                                                                                                                                                                                                                                                                                                                                                                                                                                                                                                                                                                                                                                                                                                                                                                                                                                                                                                                                                                                                                                                                                                                                                                                                                                                                                                                                                                                                                                                                                                                                                                                                                                           | E-T9I, M-Q19E, M-A63T, N-P13L, N-E3I, N-R32, N-S33, N-R203K, N-G204R, ORF1a-K856R, ORF1a-S2083, ORF1a-L2084I, ORF1a-A2710T, ORF1a-T3255I, ORF1a-P3395H, ORF1a-L3674, ORF1a-S3675-, ORF1a-G3676-, ORF1a-I3758V, ORF1b-P314L, ORF1b-I1566V, ORF9b-P105, ORF9b-E27-, ORF9b-N28-, ORF9b-A29- | -ORF1a-L3674-, -ORF1a-S3675-, -ORF1a-G3676-, -ORF1b-I1566V | E-T9I, -ORF1a-K856R, -ORF1a-A2710T, -ORF1a-L3674-, -ORF1a-S3675-, -ORF1a-G3676-, -ORF1b-I1566V |                 |     |           |     |  |  |           |     |           |     |
|          |       |           |      |           |      |           |     |           |     |           |      |           |      |                                                                                                                                                                                                                                                      |                                                                                                                                                                                                                                                      |                         |                                               |                                                                                                                                                                                                                                                                                                                                                                                                                                                                                                                                                                                                                                                                                                                                                                                                                                                                                                                                                                                                                                                                                                                                                                                                                                                                                                                                                                                                                                                                                                                                                                                                                                                                                                                                                                                                                                                                                                                                                                                                                                                                                                                                                                                                                                                                                                                                                                                                                                                                                                                                                                                                                                                                                                                                                                                                                                                                                                                                                                                                                                                                                                                                                                                                                                                                                                                                                                                                                                                                                                                                                                                                                                                                                                                                                                                                                                                                                                                                                                                                                                                                                                                                                                                                                                                                                                                                                                                                                                                                                                                                                                                                                                                                                                                                                                                                                                                                                                                                                                                                                                                                                                                                                                                                                                                                                                                                                                                                                                                                                                                                                                                                                                                                                                                                                                                                                                                                                                                                                                                                                                                                                                                                                                                                                                                                                                                                                                                                                                                                                                                                                                                                                                                                                                                                                                                                                                                                                                                                                                                                                                                                                                                                                                                                                                                                                                                                                                                                                                                                                                                                                                                                                                                                                                                                                                                                                                                                                                                                                                                                                                                                                                                                                                                                                                                                                                                                                                                                                                                                                                                                                                                                                                                                                                                                                                                                                                                                                                                                                                                                                                                                                                                                                                                                                                                                                                                                                                                                                                                                                                                                                                                                                                                                                                                                                                                                                                                                                                                                                                                                                                                                                                                                                                                           |                                                                                                                                                                                                                                                                                          |                                                            |                                                                                                |                 |     |           |     |  |  |           |     |           |     |
| sample23 | 15.25 | 99.9      | 99.8 | 99.5      | 99.4 | 21K       | 21K | 21K       | 21K | BA.1      | BA.1 | BA.1      | BA.1 | A67V, H69, V70, T9S1, G142-, V143-, Y144-, Y145D, N211-, L2121, G339D, S371L, S373P, S375F, K417N, N440K, G446S, S477N, T478K, E484A, Q493R, G496S, Q498R, N501Y, Y505H, T547K, D614G, H655Y, N679K, P681H, N764K, D796Y, N856K, Q954H, N969K, 981F] |                                                                                                                                                                                                                                                      |                         |                                               | E-T9I, M-Q19E, M-A63T, N-P13L, N-E3I, N-R32, N-S33, N-R203K, N-G204R, ORF1a-K856R, ORF1a-T1822I, ORF1a-S2083, ORF1a-L2084I, ORF1a-A2710T, ORF1a-T3255I, ORF1a-P3395H, ORF1a-L3674-, ORF1a-S3675-, ORF1a-G3676-, ORF1a-I3758V, ORF1b-P314L, ORF1b-I1566V, ORF9b-P105, ORF9b-E27-, ORF9b-N28-, ORF9b-A29-                                                                                                                                                                                                                                                                                                                                                                                                                                                                                                                                                                                                                                                                                                                                                                                                                                                                                                                                                                                                                                                                                                                                                                                                                                                                                                                                                                                                                                                                                                                                                                                                                                                                                                                                                                                                                                                                                                                                                                                                                                                                                                                                                                                                                                                                                                                                                                                                                                                                                                                                                                                                                                                                                                                                                                                                                                                                                                                                                                                                                                                                                                                                                                                                                                                                                                                                                                                                                                                                                                                                                                                                                                                                                                                                                                                                                                                                                                                                                                                                                                                                                                                                                                                                                                                                                                                                                                                                                                                                                                                                                                                                                                                                                                                                                                                                                                                                                                                                                                                                                                                                                                                                                                                                                                                                                                                                                                                                                                                                                                                                                                                                                                                                                                                                                                                                                                                                                                                                                                                                                                                                                                                                                                                                                                                                                                                                                                                                                                                                                                                                                                                                                                                                                                                                                                                                                                                                                                                                                                                                                                                                                                                                                                                                                                                                                                                                                                                                                                                                                                                                                                                                                                                                                                                                                                                                                                                                                                                                                                                                                                                                                                                                                                                                                                                                                                                                                                                                                                                                                                                                                                                                                                                                                                                                                                                                                                                                                                                                                                                                                                                                                                                                                                                                                                                                                                                                                                                                                                                                                                                                                                                                                                                                                                                                                                                                                                                                                   |                                                                                                                                                                                                                                                                                          |                                                            |                                                                                                |                 |     |           |     |  |  |           |     |           |     |
|          |       |           |      |           |      |           |     |           |     |           |      |           |      |                                                                                                                                                                                                                                                      |                                                                                                                                                                                                                                                      |                         |                                               |                                                                                                                                                                                                                                                                                                                                                                                                                                                                                                                                                                                                                                                                                                                                                                                                                                                                                                                                                                                                                                                                                                                                                                                                                                                                                                                                                                                                                                                                                                                                                                                                                                                                                                                                                                                                                                                                                                                                                                                                                                                                                                                                                                                                                                                                                                                                                                                                                                                                                                                                                                                                                                                                                                                                                                                                                                                                                                                                                                                                                                                                                                                                                                                                                                                                                                                                                                                                                                                                                                                                                                                                                                                                                                                                                                                                                                                                                                                                                                                                                                                                                                                                                                                                                                                                                                                                                                                                                                                                                                                                                                                                                                                                                                                                                                                                                                                                                                                                                                                                                                                                                                                                                                                                                                                                                                                                                                                                                                                                                                                                                                                                                                                                                                                                                                                                                                                                                                                                                                                                                                                                                                                                                                                                                                                                                                                                                                                                                                                                                                                                                                                                                                                                                                                                                                                                                                                                                                                                                                                                                                                                                                                                                                                                                                                                                                                                                                                                                                                                                                                                                                                                                                                                                                                                                                                                                                                                                                                                                                                                                                                                                                                                                                                                                                                                                                                                                                                                                                                                                                                                                                                                                                                                                                                                                                                                                                                                                                                                                                                                                                                                                                                                                                                                                                                                                                                                                                                                                                                                                                                                                                                                                                                                                                                                                                                                                                                                                                                                                                                                                                                                                                                                                                                           |                                                                                                                                                                                                                                                                                          |                                                            |                                                                                                |                 |     |           |     |  |  |           |     |           |     |
| sample24 | 17.31 | 99.8      | 99.6 | 99.5      | 99.4 | 21K       | 21K | 21K       | 21K | BA.1      | BA.1 | BA.1      | BA.1 | A67V, H69, V70, T9S1, G142-, V143-, Y144-, Y145D, N211-, L2121, G339D, S371L, S373P, S375F, K417N, N440K, G446S, S477N, T478K, E484A, Q493R, G496S, Q498R, N501Y, Y505H, T547K, D614G, H655Y, N679K, P681H, N764K, D796Y, N856K, Q954H, N969K, 981F] |                                                                                                                                                                                                                                                      |                         |                                               | [mutations [T9, D3G, Q19E, A63T, P13L, E3I, R32, S33, R203K, G204R, K856R, P1803S, V1887I, S2083-, L2084I, A2710T, M2796T, T3255I, P3395H, L3674-, S3675-, G3676-, I3758V, P314I, I1566V, P105, E27-, N28-, A29-] gene [E, M, M, N, |                                                                                                                                                                                                                                                                                          |                                                            |                                                                                                |                 |     |           |     |  |  |           |     |           |     |
