# Supplementary material for: Evaluation of EPISEQ SARS-CoV-2 and a Fully Integrated Application to Identify SARS-CoV-2 Variants from Several Next-Generation Sequencing Approaches
Source: MDPI journal article supplement (doi:10.3390/v14081674), 2022-07-29
Supplement: s1 [file s1]

(a)

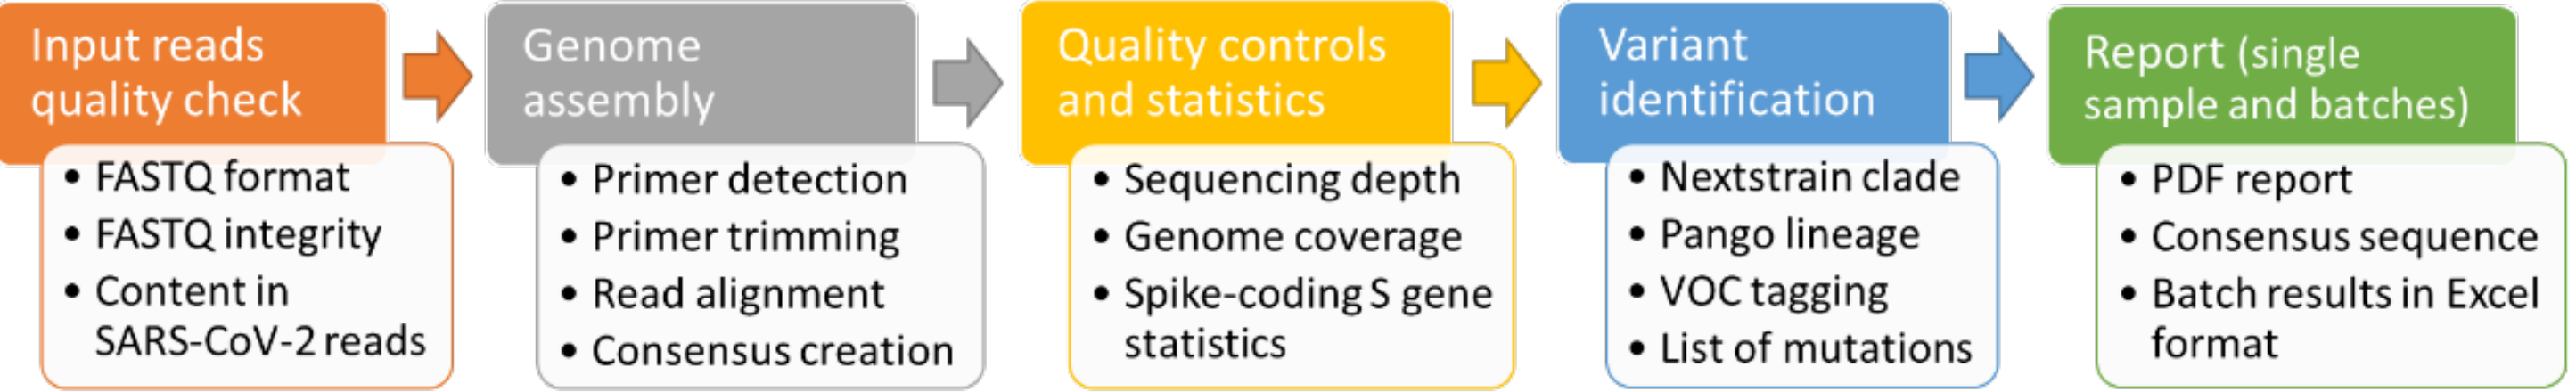

(b)

bioMérieux Data Analytics / R&D internal organization

BIOMÉRIEUX

EPISEQ<sup>®</sup> SARS-COV-2

UploadSample analysis

| QC | Sample ID | Nextstrain clade               | Pango lineage         | Spike mutations                    | Coverage | Other mutations                       |
|----|-----------|--------------------------------|-----------------------|------------------------------------|----------|---------------------------------------|
| ✓  | Sample40  | 21L (Omicron) <span>VOC</span> | BA.2 <span>VOC</span> | T19I, L24-, P25-, P26-, A27S, G... | 99.55 %  | E:T9I, M:Q19E, M:A63T, N:P13L, N:E... |
| ✓  | Sample39  | 21L (Omicron) <span>VOC</span> | BA.2 <span>VOC</span> | T19I, L24-, P25-, P26-, A27S, G... | 99.51 %  | E:T9I, M:Q19E, M:A63T, N:P13L, N:E... |
| ✓  | Sample38  | 21L (Omicron) <span>VOC</span> | BA.2 <span>VOC</span> | T19I, L24-, P25-, P26-, A27S, G... | 99.72 %  | E:T9I, M:Q19E, M:A63T, N:P13L, N:E... |
| ✓  | Sample37  | 21L (Omicron) <span>VOC</span> | BA.2 <span>VOC</span> | T19I, L24-, P25-, P26-, A27S, G... | 98.62 %  | E:T9I, M:Q19E, M:A63T, N:P13L, N:E... |
| ✓  | Sample35  | 21L (Omicron) <span>VOC</span> | BA.2 <span>VOC</span> | T19I, L24-, P25-, P26-, A27S, G... | 99.67 %  | E:T9I, M:Q19E, M:A63T, N:P13L, N:E... |
| ✓  | Sample34  | 21L (Omicron) <span>VOC</span> | BA.2 <span>VOC</span> | T19I, L24-, P25-, P26-, A27S, G... | 99.58 %  | E:T9I, M:Q19E, M:A63T, N:P13L, N:E... |
| ✓  | Sample33  | 21L (Omicron) <span>VOC</span> | BA.2 <span>VOC</span> | T19I, L24-, P25-, P26-, A27S, G... | 99.59 %  | E:T9I, M:Q19E, M:A63T, N:P13L, N:E... |
| ✓  | Sample32  | 21L (Omicron) <span>VOC</span> | BA.2 <span>VOC</span> | T19I, L24-, P25-, P26-, A27S, G... | 98.72 %  | E:T9I, M:Q19E, M:A63T, N:P13L, N:E... |

EPISEQ<sup>®</sup> SARS-COV-2 v1.1.0 - Not for diagnostic use.

(c)

EPISEQ<sup>®</sup> SARS-COV-2

BIOMÉRIEUX

Sample Analysis Report

Sample ID: Sample25

Status: Valid sample for SARS-CoV-2 variant identification and good quality genome.

RESULTS

SARS-COV-2 variant:

|                  |                                |
|------------------|--------------------------------|
| Nextstrain clade | 21K (Omicron) <span>VOC</span> |
| Pango lineage    | BA.1 <span>VOC</span>          |

Variant of concern detected

SARS-COV-2 Spike mutations (amino acid changes):

A67V  
H69-  
V70-  
T95I  
G142-  
V143-  
Y144-  
Y145D  
N211-  
L212I  
G339D  
S371L  
S373P  
S375F  
K417N  
N440K  
G446S  
S477N

SAMPLE DATA

Sequencing:

|                                |                                                                      |
|--------------------------------|----------------------------------------------------------------------|
| Technology                     | Illumina (paired-end)                                                |
| Uploaded files                 | BS11001_S25_L001_R1_001.fastq.gz<br>BS11001_S25_L001_R2_001.fastq.gz |
| Number of reads                | 929970                                                               |
| Number of sequenced base pairs | 60.93 Mb                                                             |

Genome:

|                      |                         |
|----------------------|-------------------------|
| Quality              | Good                    |
| File name            | Sample25.consensus.fa   |
| Length               | 29871 bp                |
| Coverage             | 99.84%                  |
| Sequencing depth     | 1755.40 x (downsampled) |
| Number of ACGT bases | 29858                   |

S gene (Spike)

|                            |         |
|----------------------------|---------|
| Percent of ACGT bases      | 100.0 % |
| Number of N bases          | 0       |
| Longest stretch of N bases | 0       |

Mutations in other genes:

| Gene  | Mutation |
|-------|----------|
| E     | T9I      |
| M     | D3G      |
| M     | Q19E     |
| M     | A63T     |
| N     | P13L     |
| N     | E31-     |
| N     | R32-     |
| N     | S33-     |
| N     | R203K    |
| N     | G204R    |
| ORF1a | K856R    |
| ORF1a | S2083-   |
| ORF1a | L2084I   |
| ORF1a | A2710T   |
| ORF1a | T3255I   |
| ORF1a | P3395H   |

METHODS

EPISEQ<sup>®</sup> SARS-COV-2 release 1.1.0

Pipeline version 2022-07-08

Reference genome and third-party tool versions

|                               |                 |
|-------------------------------|-----------------|
| Reference genome for assembly | MN908947.3      |
| pangolin                      | 4.1.1           |
| pangoLEARN                    | 1.11            |
| Nextclade                     | nextclade 2.2.0 |

APPENDIX

Variant of Concern (VOC)

If a VOC is detected in the sample, it is highlighted in the result table, page 1. The definition of the VOC is based on:

the CDC: <https://www.cdc.gov/coronavirus/2019-ncov/cases-updates/variant-surveillance/variant-info.html>

the WHO: <https://www.who.int/en/activities/tracking-SARS-CoV-2-variants/>

| Pango lineage   | Nextstrain clade | WHO label | First Detected     | Earliest sample date |
|-----------------|------------------|-----------|--------------------|----------------------|
| B.1.1.7 / Q*    | 20I (Alpha, V1)  | Alpha     | United Kingdom     | September 2020       |
| B.1.351*        | 20H (Beta, V2)   | Beta      | South Africa       | May 2020             |
| P.1*            | 20J (Gamma, V3)  | Gamma     | Brazil             | November 2020        |
| B.1.617.2 / AY* | 21A (Delta)      | Delta     | India              | October 2020         |
| B.1.617.2 / AY* | 21I (Delta)      | Delta     | India              | October 2020         |
| B.1.617.2 / AY* | 21J (Delta)      | Delta     | India              | October 2020         |
| B.1.1.529 / BA* | 21K (Omicron)    | Omicron   | Multiple Countries | November 2021        |
| B.1.1.529 / BA* | 21L (Omicron)    | Omicron   | Multiple Countries | November 2021        |
| B.1.1.529 / BA* | 21M (Omicron)    | Omicron   | Multiple Countries | November 2021        |
| B.1.1.529 / BA* | 22A (Omicron)    | Omicron   | Multiple Countries | November 2021        |
| B.1.1.529 / BA* | 22B (Omicron)    | Omicron   | Multiple Countries | November 2021        |
| B.1.1.529 / BA* | 22C (Omicron)    | Omicron   | Multiple Countries | November 2021        |

\*Includes all descendent lineages.

**Figure S1:** Description of EPISEQ SARS-COV-2 pipeline workflow (a), result display (b) and sample report (c)
